# Supplementary material
Source: PubMed Central journal article supplement (PMC3911419)
Supplement: JCM.02519-13_zjm999093084so1.pdf [file JCM.02519-13_zjm999093084so1.pdf]

## Supplementary information

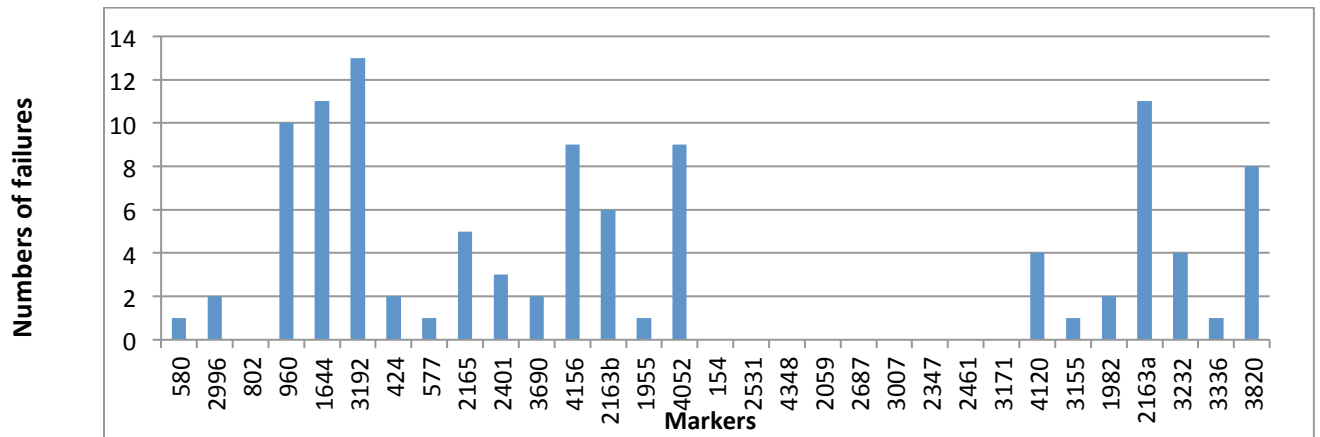

Supplementary Fig. 1a: Typeability of the standard and hypervariable (last seven) markers. Numbers of failures represent the numbers of DNA samples for which an allele of a specific marker was not detected after PCR amplification, on the reproducibility panel of 546 isolates. Note that, for the standard markers, one partner laboratory out of 6 only used the standard 15-locus discriminatory subset, and for the hypervariable markers, typing was done by 5 laboratories out of 6, of which one used only markers 4120 and 3820.

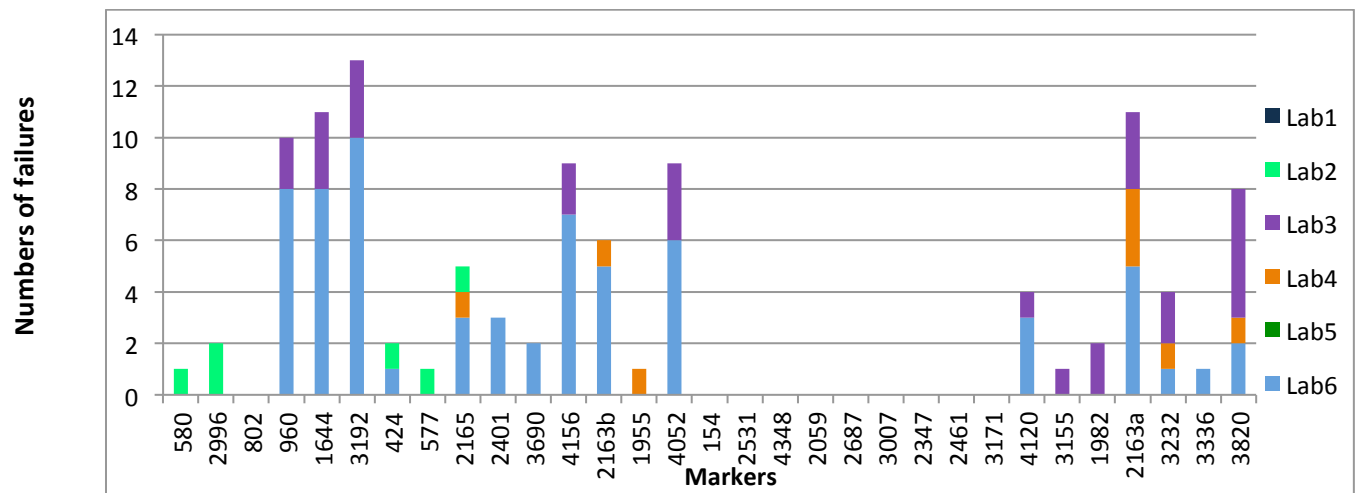

Supplementary Fig. 1b: Typeability of the standard and hypervariable markers (last seven markers). Same as in supplementary Fig. 1a, except that the distribution of failures among the laboratories is shown.

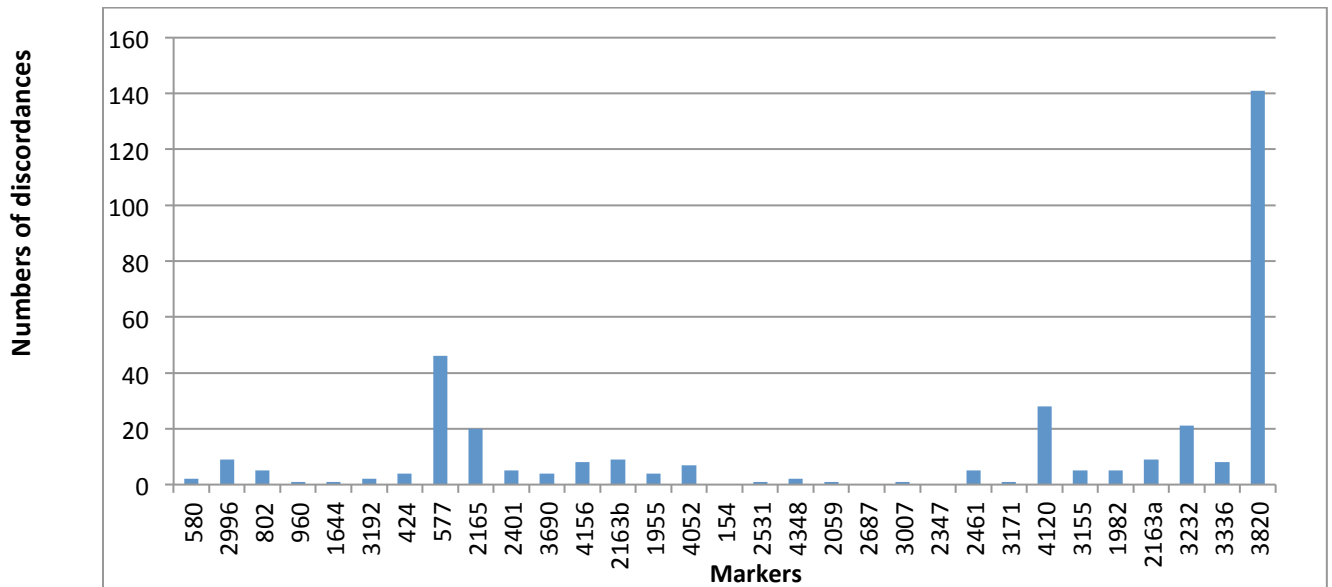

Supplementary Fig. 1c: reproducibility of the standard and hypervariable (last seven) markers. Numbers of discordances per marker represent the numbers of DNA samples for which a discordance was found between Genoscreen and partner laboratories, on the reproducibility panel of 546 isolates. Note that, for the standard markers, one partner laboratory out of 6 only used the standard 15-locus discriminatory subset, and for the hypervariable markers, typing was done by 5 laboratories out of 6, of which one used only markers 4120 and 3820.

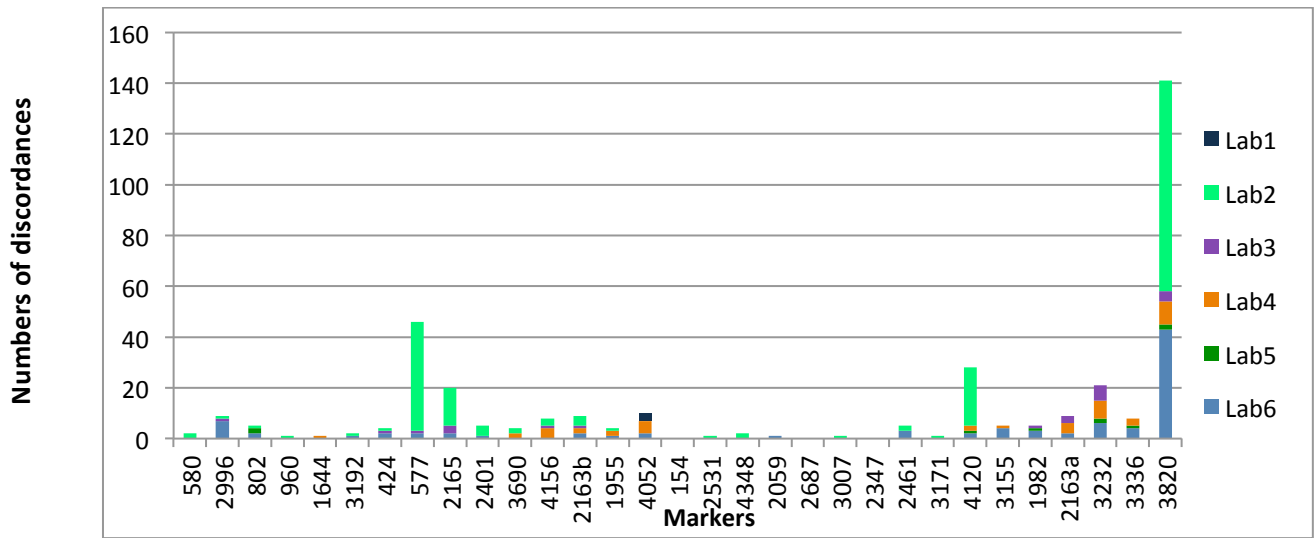

Supplementary Fig. 1d: reproducibility of the standard and hypervariable (last seven) markers. Same as in Fig. 1c, except that the distribution of discordances among the laboratories is shown.

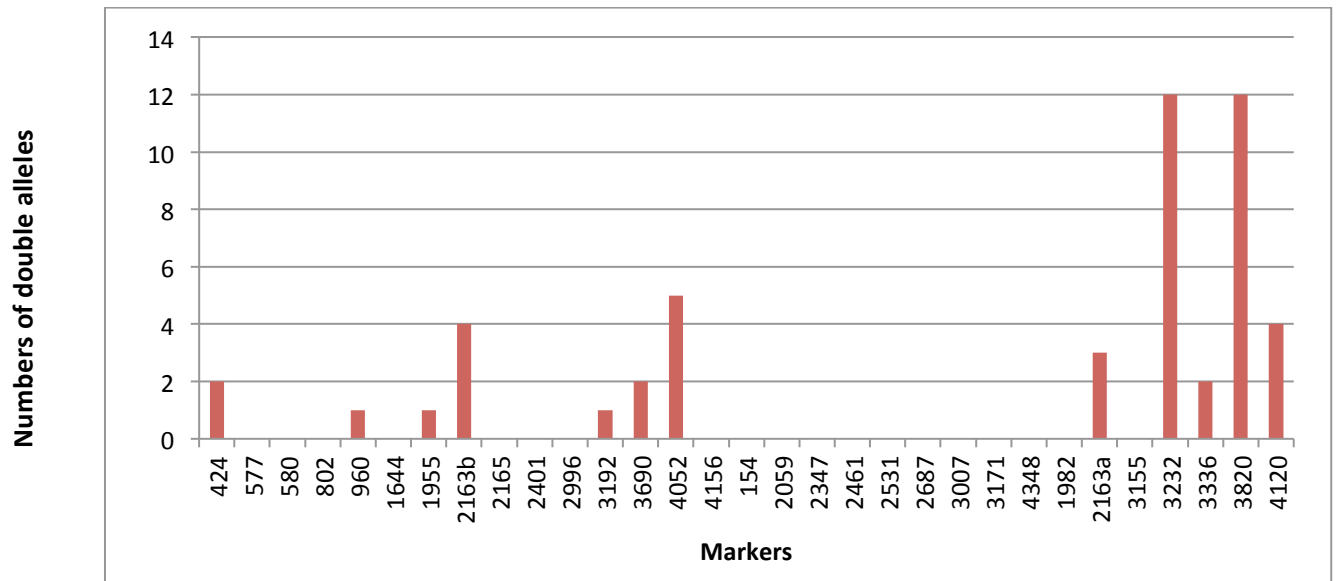

Supplementary Fig. 2: numbers of double alleles detected per marker on the global strain panel of 535 isolates.

| Allele            | Marker |      |      |      |      |      |      |       |      |      |      |      |      |      |      |      |      |      |      |      |      |      |      |      |      |       |      |      |      |      |      |    |  |
|-------------------|--------|------|------|------|------|------|------|-------|------|------|------|------|------|------|------|------|------|------|------|------|------|------|------|------|------|-------|------|------|------|------|------|----|--|
|                   | 424    | 577  | 580  | 802  | 960  | 1644 | 1955 | 2163b | 2165 | 2401 | 2996 | 3192 | 3690 | 4052 | 4156 | 154  | 2059 | 2347 | 2461 | 2531 | 2687 | 3007 | 3171 | 4348 | 1982 | 2163a | 3155 | 3232 | 3336 | 3820 | 4120 |    |  |
| 0                 |        |      | 18   |      |      |      |      |       |      |      |      |      |      | 2    |      |      |      |      |      |      |      |      |      |      |      |       |      | 3    |      |      |      |    |  |
| 1                 | 3      |      |      | 12   | 27   | 1    | 1    | 1     |      |      |      |      | 1    |      |      |      | 7    |      |      | 4    | 534  | 6    |      |      |      |       |      |      | 1    |      | 1    |    |  |
| 2                 | 10     | 2    | 512  | 10   | 64   | 5    |      | 14    | 8    | 26   | 1    | 3    | 2    | 12   | 430  | 534  | 527  | 17   | 535  |      | 1    | 8    |      | 13   |      | 5     | 42   | 1    | 1    | 1    |      |    |  |
| 3s                |        |      | 5    |      |      |      |      |       |      |      |      |      |      |      |      |      |      |      |      |      |      |      |      |      |      |       |      |      |      |      |      |    |  |
| 3                 | 35     | 5    |      | 498  | 439  | 509  | 10   | 26    | 33   | 5    | 5    | 8    | 469  |      | 32   | 1    | 1    | 5    |      | 1    |      | 510  | 532  | 447  |      |       | 7    | 1    |      |      | 5    |    |  |
| 4                 | 477    | 519  |      | 15   | 4    | 17   | 100  | 32    | 487  | 504  | 1    | 10   | 57   | 2    | 64   |      |      | 512  |      | 4    |      | 11   | 3    | 74   | 4    | 1     | 471  | 2    | 9    | 1    | 1    |    |  |
| 5                 | 8      | 7    |      |      |      |      | 402  | 86    | 2    |      | 111  | 506  | 4    | 2    | 4    |      |      | 1    |      | 518  |      |      |      |      |      | 3     | 5    | 12   | 1    | 14   | 1    | 14 |  |
| 6                 |        | 1    |      |      |      |      | 13   | 322   |      |      | 25   | 6    |      | 84   |      |      |      |      | 5    |      |      |      | 1    |      |      | 102   | 66   | 3    | 6    | 3    | 1    | 14 |  |
| 7                 |        | 1    |      |      |      |      | 3    | 38    |      |      | 369  |      |      | 118  |      |      |      |      | 2    |      |      |      |      |      |      | 28    | 7    |      | 10   | 481  | 4    | 8  |  |
| 8                 |        |      |      |      |      |      | 2    | 7     |      |      | 14   | 1    |      | 280  |      |      |      |      | 1    |      |      |      |      |      |      | 288   | 15   | 5    | 13   | 3    | 59   |    |  |
| 9                 |        |      |      |      |      |      | 1    | 2     |      |      | 5    |      |      | 23   |      |      |      |      |      |      |      |      |      |      |      | 18    | 379  | 22   | 4    | 9    | 51   |    |  |
| 10                |        |      |      |      |      |      |      |       |      |      | 1    |      |      | 8    |      |      |      |      |      |      |      |      |      |      |      | 77    | 25   | 16   | 6    | 11   | 314  |    |  |
| 11                |        |      |      |      |      |      |      |       |      |      |      |      |      | 1    |      |      |      |      |      |      |      |      |      |      |      | 6     | 2    | 103  | 1    | 11   | 22   |    |  |
| 12                |        |      |      |      |      |      |      |       |      |      | 2    |      |      |      |      |      |      |      |      |      |      |      |      |      |      |       |      |      | 41   |      | 82   | 13 |  |
| 13                |        |      |      |      |      | 1    |      |       |      |      |      |      |      |      |      |      |      |      |      |      |      |      |      |      |      | 3     | 1    | 163  |      | 7    | 8    |    |  |
| 14s               |        |      |      |      |      |      |      |       |      |      |      |      |      |      |      |      |      |      |      |      |      |      |      |      |      |       |      |      |      |      | 1    |    |  |
| 14                |        |      |      |      |      |      |      |       |      |      |      |      |      |      |      |      |      |      |      |      |      |      |      |      |      | 5     |      | 56   |      | 300  | 7    |    |  |
| 15                |        |      |      |      |      |      |      |       |      |      |      |      |      |      |      |      |      |      |      |      |      |      |      |      |      |       |      | 32   |      | 34   | 3    |    |  |
| 16s               |        |      |      |      |      |      |      |       |      |      |      |      |      |      |      |      |      |      |      |      |      |      |      |      |      |       |      |      |      |      | 1    |    |  |
| 16                |        |      |      |      |      |      |      |       |      |      |      |      |      |      |      |      |      |      |      |      |      |      |      |      |      |       |      | 22   |      | 25   | 2    |    |  |
| 17                |        |      |      |      |      |      |      |       |      |      |      |      |      |      |      |      |      |      |      |      |      |      |      |      |      |       |      | 8    |      | 4    | 1    |    |  |
| 18                |        |      |      |      |      |      |      |       |      |      |      |      |      |      |      |      |      |      |      |      |      |      |      |      |      |       |      | 5    |      | 10   | 2    |    |  |
| 19                |        |      |      |      |      |      |      |       |      |      |      |      |      |      |      |      |      |      |      |      |      |      |      |      |      |       |      | 4    |      | 4    | 1    |    |  |
| 20                |        |      |      |      |      |      |      |       |      |      |      |      |      |      |      |      |      |      |      |      |      |      |      |      |      |       |      | 2    |      | 3    | 2    |    |  |
| 21                |        |      |      |      |      |      |      |       |      |      |      |      |      |      |      |      |      |      |      |      |      |      |      |      |      |       |      | 2    |      |      |      |    |  |
| 22                |        |      |      |      |      |      |      |       |      |      |      |      |      |      |      |      |      |      |      |      |      |      |      |      |      |       |      | 8    |      |      |      |    |  |
| 23                |        |      |      |      |      |      |      |       |      |      |      |      |      |      |      |      |      |      |      |      |      |      |      |      |      |       |      | 1    |      |      | 1    |    |  |
| 24                |        |      |      |      |      |      |      |       |      |      |      |      |      |      |      |      |      |      |      |      |      |      |      |      |      |       |      |      |      |      |      |    |  |
| 25                |        |      |      |      |      |      |      |       |      |      |      |      |      |      |      |      |      |      |      |      |      |      |      |      |      |       |      |      |      |      |      | 6  |  |
| Allelic diversity | 0,19   | 0,06 | 0,08 | 0,13 | 0,31 | 0,08 | 0,39 | 0,59  | 0,15 | 0,11 | 0,48 | 0,10 | 0,21 | 0,64 | 0,33 | 0,00 | 0,03 | 0,08 | 0,00 | 0,06 | 0,00 | 0,09 | 0,01 | 0,28 | 0,65 | 0,42  | 0,22 | 0,83 | 0,18 | 0,63 | 0,62 |    |  |
| No fragment       |        |      |      |      |      | 3    |      | 3     | 4    |      | 1    |      |      |      | 3    |      |      |      |      |      |      |      |      |      |      | 1     | 9    |      | 2    |      | 2    | 2  |  |
| double allele     | 2      |      |      |      | 1    |      | 1    | 4     |      |      |      | 1    | 2    | 5    |      |      |      |      |      |      |      |      |      |      |      |       | 3    | 12   | 2    | 12   | 4    |    |  |
| multi             |        |      |      |      |      |      |      |       |      |      |      |      |      |      |      |      |      |      |      |      |      |      |      |      |      |       | 5    | 6    |      |      | 1    | 1  |  |
| >1400 bp          |        |      |      |      |      |      |      | 1     |      |      |      |      |      |      |      |      |      |      |      |      |      |      |      |      |      |       |      | 12   | 1    |      |      |    |  |

Supplementary Table 1: Allelic diversities, double alleles and lack of amplification or problematic results observed for the standard and hypervariable (last seven) markers on the global strain panel including 535 isolates. “No fragment” corresponds to no amplification after two independent rounds of PCR. “Double allele” corresponds to two fragments found for one marker. “Multi” stands for multi-banded pattern with no clear, typical stutter peak pattern. “>1400bp” indicates fragments with sizes over 1400 bp for which size and allele could not accurately be determined.
